# Supplementary material for: Single-Cell RNAseq Resolve the Potential Effects of LanCL1 Gene in the Mouse Testis
Source: MDPI journal article supplement (doi:10.3390/cells11244135), 2022-12-19
Supplement: s1 [file s1]

| Antibodies                  | Source                    | Identifier                    |
|-----------------------------|---------------------------|-------------------------------|
| Rabbit anti-Lancl 1         | Thermo Scientific         | Cat# PA5-57107;<br>AB_2643270 |
| Rabbit anti- $\beta$ -actin | Cell Signaling Technology | Cat#4970S; AB_2223172         |
| Donkey anti-rabbit Alexa555 | Thermo Scientific         | Cat#31572; RRID: AB_162543    |
| DAPI                        | Thermo Scientific         | Cat#D3571                     |
| Testosterone Assay K        | R&D Systems               | Cat#KGE010                    |
| RNeasy Mini Kit             | Qiagen                    | Cat#74104                     |
